# Supplementary material for: Knobs-into-holes antibody production in mammalian cell lines reveals that asymmetric afucosylation is sufficient for full antibody-dependent cellular cytotoxicity
Source: PubMed Central journal article supplement — MAbs. 2013 Aug 29;5(6):872–81. doi: 10.4161/mabs.26307 (PMC3896601; doi:10.4161/mabs.26307), 2013-08-29
Supplement: mabs-5-872-s01.pdf [file mabs-5-872-s01.pdf]

## **Supplemental Material to:**

**Whitney Shatz, Shan Chung, Bing Li, Brett Marshall, Max Tejada, Wilson Phung, Wendy Sandoval, Robert F Kelley, and Justin M Scheer**

**Knobs-into-holes antibody production in mammalian cell lines reveals that asymmetric afucosylation is sufficient for full antibody-dependent cellular cytotoxicity**

**mAbs 2013; 5(6)**

**<http://dx.doi.org/10.4161/mabs.26307>**

**<http://www.landesbioscience.com/journals/mabs/article/26307/>**

## **Supplemental Figures Legend**

### **Figure S1. N-linked afucosylated carbohydrate species.**

Quantification of N-linked afucosylated species using GlycoChip shows a difference in relative abundance of structures when core fucose is absent. These longer adducts do not appear to affect ADCC potency.

### **Figure S2. ADCC potencies of various heterodimers are reproducible in different cell based assays.**

ADCC potencies of heterodimer and asymmetric antibodies were tested using two different PBMC donors. In addition, the assay was run using an engineered NK cell line on two different days to test for consistency and reproducibility of ADCC. Though raw values vary, the trend remains consistent among assays demonstrating that the absence of only one core fucose is required to achieve high potencies similar to complete afucosylation.



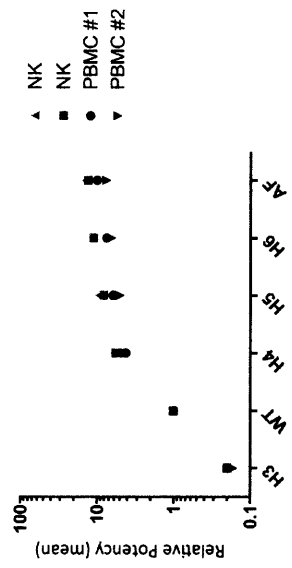

|                          | Parental ½ mAb | version* | Host          | ProA Recovery (mg/L) | Knob | Hole |
|--------------------------|----------------|----------|---------------|----------------------|------|------|
| Shake Flask or Transient | anti-CD20      | 1        | CHO           | 7                    |      | x    |
|                          |                | 2        | CHO           | 73                   | x    |      |
|                          |                | 2        | CHO           | 78                   | x    |      |
|                          |                | 1        | CHO           | 25                   |      | x    |
|                          |                | 3        | Fut8KO        | 15                   | x    |      |
|                          |                | 4        | Fut8KO        | 10                   |      | x    |
|                          |                | 5        | <i>E.coli</i> | 8                    | x    |      |
|                          | Ab-1           | 1        | CHO           | 6.5                  |      | x    |
|                          |                | 2        | CHO           | 81                   |      | x    |
|                          |                | 3        | CHO           | 90                   |      | x    |
|                          | Ab-2           | 1        | CHO           | 8                    | x    |      |
|                          |                | 2        | CHO           | 22                   | x    |      |
|                          |                | 3        | CHO           | 30                   | x    |      |
|                          | Ab-3           | 1        | CHO           | 85                   |      | x    |
|                          | Ab-4           | 2        | CHO           | 13                   | x    |      |
|                          | Ab-5           | 1        | <i>E.coli</i> | 12.8                 | x    |      |
|                          |                | 2        | <i>E.coli</i> | 7                    | x    |      |
|                          | Ab-6           | 1        | CHO           | 26.5                 |      | x    |
|                          |                | 2        | CHO           | 96                   |      | x    |
|                          | Ab-7           | 1        | CHO           | 96.2                 | x    |      |
|                          |                | 2        | CHO           | 70                   | x    |      |
|                          | Ab-8           | 1        | <i>E.coli</i> | 5.2                  |      | x    |
| Fed-batch or Stable      | Ab-2           | 1        | <i>E.coli</i> | 567.8                | x    |      |
|                          |                | 1        | <i>E.coli</i> | 413.6                | x    |      |
|                          | Ab-3           | 1        | <i>E.coli</i> | 186                  |      | x    |
|                          | Ab-4           | 1        | <i>E.coli</i> | 60                   | x    |      |
|                          | Ab-5           | 1        | <i>E.coli</i> | 200                  | x    |      |
|                          |                | 2        | <i>E.coli</i> | 360                  | x    |      |
|                          | Ab-6           | 3        | CHO           | 2000                 |      | x    |
|                          | Ab-7           | 3        | CHO           | 2500                 | x    |      |
|                          | Ab-9           | 1        | CHO           | 1600                 | x    |      |

\*denotes sequence variants of the same parental antibody

Supplemental Table S1. Protein-A yields for half-antibodies derived from *E.coli*, CHO and Fut8KO cell lines. *E.coli* Pro-A yields are from either shake flask cultures (top) or fed-batch cultures (bottom), while mammalian host Pro-A yields are from either transient expression cultures (top) or stable cell cultures (bottom). Each antibody (Ab) is against a unique target and blinded in this table.

|             | Theoretical<br>G <sub>0</sub> Mass | Measured G <sub>0</sub><br>Mass | Theoretical Mass<br>(without<br>glycosylation) | Measured Mass<br>(PNGase<br>treated) |
|-------------|------------------------------------|---------------------------------|------------------------------------------------|--------------------------------------|
| knob/knob   | 148,346.98                         | N/O                             | 145,731.80                                     | N/O                                  |
| hole/hole   | 147,936.46                         | N/O                             | 145,321.28                                     | N/O                                  |
| heterodimer | 148,141.72                         | 148,125.72                      | 145,526.54                                     | 145,530.91                           |

Supplemental Table S2. Comparison of theoretical and MS measured masses for H6
